# Supplementary material
Source: ML conference proceedings conference paper supplement (https://openreview.net/forum?id=OzbkiUo24g)
Supplement: supplementary_material [file attachment]

# 1 Proof of Proposition 2.1

2 **Lemma 1.1.**  $\forall i \in [0, d]$ ,

$$\binom{d}{i} \sum_{j=0}^k \frac{\binom{k}{j}}{\binom{d+k}{i+j}} = \frac{k+d+1}{d+1}.$$

3 *Proof.* Let

$$\frac{\binom{d}{i} \binom{k}{j}}{\binom{d+k}{i+j}} = \frac{d!k!(i+j)!(d+k-i-j)!}{i!(d-i)!j!(k-j)!(d+k)!} = \frac{\binom{d+k-i-j}{d-i} \binom{i+j}{i}}{\binom{d+k}{k}}$$

4 Following the Vandermonde's identity

$$\sum_{j=0}^{d-i} \binom{d+k-i-j}{d-i} \binom{i+j}{i} = \frac{k+d+1}{d+1} \binom{d+k}{k}.$$

5 Then we can conclude that

$$\sum_{j=0}^k \frac{\binom{k}{j} \binom{d}{i}}{\binom{d+k}{i+j}} = \sum_{j=0}^k \frac{\binom{d+k-i-j}{d-i} \binom{i+j}{i}}{\binom{d}{k}} = \frac{k+d+1}{d+1}$$

6 □

7 *Proof.* The additivity comes directly from inner product is additive.

8 Scale invariant is also standard to prove, but more tedious.

9 Without loss of generality, denote  $p = a_0 y^0 + \dots + a_i y^i + \dots + a_d y^d$ , and  $q = p \odot (1+y)^k =$   
 10  $b_0 y^0 + \dots + b_j y^j + \dots + b_{d+k} y^{d+k}$ . Using definition of  $\psi$ , we have:

$$\psi(p) = \frac{1}{d+1} \sum_{i=0}^d a_i \frac{1}{\binom{d}{i}}$$

11 On the other hand, the coefficient of  $(1+y)^k$  is also binomial coefficient,  $\psi(q)$  can be simplified  
 12 into

$$\psi(q) = \frac{1}{d+k+1} \sum_{i=0}^d a_i \sum_{j=0}^k \frac{\binom{k}{j}}{\binom{d+k}{i+j}}.$$

13 Observe the ratio between weights of  $a_i$  from both  $\psi(p), \psi(q)$ . Using Lemma 1.1, we can obtain

$$\frac{d+k+1}{d+1} \sum_{j=0}^k \frac{\binom{d}{i} \binom{k}{j}}{\binom{d+k}{i+j}} = 1.$$

14 Therefore,  $\psi(p) = \psi(q)$ .

15 □
